# Supplementary material
Source: ML conference proceedings conference paper supplement (https://openaccess.thecvf.com/content/CVPR2023/html/Chen_Unsupervised_Sampling_Promoting_CVPR_2023_paper.html)
Supplement: Supplementary file 2 [file Chen_Unsupervised_Sampling_Promoting_CVPR_2023_supplemental.zip]

Archive with 3 entries (2 files):
- sup_414 4/
- sup_414 4/CVPR_2023_supplementary_paper_414__camera_ready.pdf
- sup_414 4/demo.mp4
